# Supplementary material for: Different computed tomography patterns of Coronavirus Disease 2019 (COVID-19) between survivors and non-survivors
Source: PubMed Central journal article supplement (PMC7347874; doi:10.1038/s41598-020-68057-4), 2020-07-09
Supplement: 41598_2020_68057_MOESM1_ESM.pdf [file 41598_2020_68057_MOESM1_ESM.pdf]

## **Full Title**

Different computed tomography patterns of Coronavirus Disease 2019 (COVID-19) between survivors and non-survivors

## **Authors**

Feng Pan, MD<sup>\*1,2</sup>, Chuansheng Zheng, Prof, MD, PhD<sup>\*1,2</sup>, Tianhe Ye, MD<sup>1,2</sup>, Lingli Li, MD<sup>1,2</sup>, Dehan Liu, MD<sup>1,2</sup>, Lin Li, MD<sup>1,2</sup>, Richard L. Hesketh, MD, PhD<sup>3</sup>, Lian Yang, Prof, MD<sup>1,2</sup>.

\*These two authors contributed equally to the article.

<sup>1</sup>Department of Radiology, Union Hospital, Tongji Medical College, Huazhong University of Science and Technology, Jiefang Avenue #1277, Wuhan, 430022, China.

<sup>2</sup>Hubei Province Key Laboratory of Molecular Imaging, Wuhan, 430022, China.

<sup>3</sup>Department of Radiology, University College London Hospital, 235, Euston Road, London, NW1 2BU, UK.

## **Corresponding Author**

Lian Yang, MD

Email: [yanglian@hust.edu.cn](mailto:yanglian@hust.edu.cn)

**Supplementary Table S1. Curve estimations between survivor and non-survivor groups**

| Equation                 | Survivor group,<br>n=83. |                  | Non-survivor group,<br>n=41. |                  |
|--------------------------|--------------------------|------------------|------------------------------|------------------|
|                          | R <sup>2</sup>           | p value          | R <sup>2</sup>               | p value          |
| Linear                   | 0.247                    | <0.001           | 0.635                        | <0.001           |
| Logarithmic <sup>a</sup> |                          |                  |                              |                  |
| Inverse <sup>b</sup>     |                          |                  |                              |                  |
| Quadratic                | 0.455                    | <0.001           | 0.708                        | <0.001           |
| <b>Cubic</b>             | <b>0.545</b>             | <b>&lt;0.001</b> | <b>0.711</b>                 | <b>&lt;0.001</b> |
| Compound <sup>c</sup>    |                          |                  | 0.659                        | <0.001           |
| Power <sup>a,c</sup>     |                          |                  |                              |                  |
| S <sup>b,c</sup>         |                          |                  |                              |                  |
| Growth <sup>c</sup>      |                          |                  | 0.659                        | <0.001           |
| Exponential <sup>c</sup> |                          |                  | 0.659                        | <0.001           |
| Logistic <sup>c</sup>    |                          |                  | 0.659                        | <0.001           |

**Note:** <sup>a</sup> If the independent variable (Time from the onset of initial symptoms (d)) contains non-positive values, the Logarithmic and Power models cannot be calculated; <sup>b</sup> if the independent variable (Time from the onset of initial symptoms (d)) contains values of zero, the Inverse and S models cannot be calculated; <sup>c</sup> If the dependent variable (total score) contains non-positive values, the Log transform cannot be applied and the Compound, Power, S, Growth, Exponential, and Logistic models cannot be calculated.
